# Supplementary material for: Is Parental Mindfulness Associated with Quality of Life and Itch Intensity in Children with Psoriasis and Eczema and Well-being in Parents?
Source: Springer Nature journal article supplement (doi:10.1007/s12671-021-01733-2), 2021-09-04
Supplement: MOESM2 [file 19632500]

**Supplementary Materials B**

**Table 1. T-test comparisons of eczema versus psoriasis participants.**

|  | Eczema | | Psoriasis | | *t* | *p* |
| --- | --- | --- | --- | --- | --- | --- |
|  | *M* | *SD* | *M* | *SD* |  |  |
| Parents |  |  |  |  |  |  |
| Age | 39.79 | 6.88 | 40.44 | 7.92 | 0.58 | .56 |
| Dispositional mindfulness (FFMQ Total) | 124.29 | 19.46 | 126.93 | 18.91 | 0.89 | .38 |
| Parental Stress (PIP Frequency) | 97.24 | 33.40 | 90.25 | 32.89 | 1.35 | .18 |
| Parental Stress (PIP Difficulty) | 96.00 | 37.51 | 88.59 | 34.18 | 1.30 | .20 |
| Depression (DASS-21) | 6.62 | 6.62 | 4.65 | 5.60 | 2.16 | .032 |
| Anxiety (DASS-21) | 5.82 | 5.58 | 4.91 | 5.05 | 1.08 | .28 |
| General Stress (DASS-21) | 9.04 | 6.63 | 7.09 | 4.94 | 2.31 | .022 |
| Quality of Life (FDLQI) | 13.40 | 7.93 | 10.82 | 6.65 | 2.38 | .019 |
| Children |  |  |  |  |  |  |
| Age | 9.60 | 3.91 | 11.64 | 3.62 | 3.29 | < .001 |
| Duration of condition | 7.45 | 4.18 | 4.01 | 3.57 | 5.15 | < .001 |
| Quality of Life (CDLQI) | 10.62 | 71.13 | 8.75 | 7.14 | 2.89 | .004 |
| Itch Intensity | 6.62 | 2.60 | 5.34 | 2.78 | 1.63 | .11 |

**Table 2. Chi-square comparisons of eczema versus psoriasis participants.**

|  | Eczema | Psoriasis | *𝜒*2 | *p* |
| --- | --- | --- | --- | --- |
| Parents |  |  |  |  |
| Gender | 88.8% female | 85.7% female | 0.37 | .54 |
| Employment status | 70.7% employed | 71.9% employed | 0.03 | .86 |
| Ethnicity | 67.1% White British | 86.0% White British | 7.32 | .007 |
| Education | 56.4% secondary school or lower | 71.9% secondary school or lower | 4.18 | .04 |
| Children |  |  |  |  |
| Gender | 56% female | 69.1% female | 2.72 | .099 |
| Other medical conditions | 50.4% have other medical conditions | 34.5% have other medical conditions | 3.87 | .050 |
| Skin condition severity | 13.6% mild; 37.6% moderate; 48.8% severe | 16.7% mild; 59.3% moderate; 24.1% severe | 9.83 | .007 |
| Gender | 56% female | 69.1% female | 2.72 | .099 |
