# Supplementary material for: Is Parental Mindfulness Associated with Quality of Life and Itch Intensity in Children with Psoriasis and Eczema and Well-being in Parents?
Source: Springer Nature journal article supplement (doi:10.1007/s12671-021-01733-2), 2021-09-04
Supplement: MOESM3 [file 19632500]

# Supplementary Materials C

Variables with multiple categories were dummy coded: education level was recoded into 1 = undergraduate or postgraduate degree and 0 = post-secondary school or lower; skin condition severity was recoded into 1 = mild or moderate and 0 = severe.

Parents who were unemployed reported higher levels of parenting stress (frequency; *p* = .034), anxiety (*p* = .022), and poorer quality of life (*p* = .009) than those who were employed. Parents who were white-British reported lower levels of parenting stress (frequency, *p* = .037; difficulty *p* = .023), and higher quality of life (*p*=.033) than those who were not white-British. Parents who were educated to undergraduate level reported higher levels of general stress than those educated to secondary school level or lower (*p* = .025). Parents of children with more severe skin conditions also scored higher in parental stress (frequency, *p* <.001; difficulty, *p* <.001), and poorer quality of life (*p* <.001) than children with less severe skin conditions. Children with more severe skin conditions also reported poorer quality of life (*p* <.001) and more itch intensity (*p* <.001) than children with less severe skin conditions. Parents of children with eczema reported poorer quality of life than parents of children with psoriasis (*p* =.003). Children with eczema reported more itch intensity than children with psoriasis (*p =* .002). Parents of children who had also other medical conditions reported higher levels of parental stress (frequency, *p*<.001; difficulty, *p*<.001), depression (*p* = .003), anxiety (*p* <.001), general stress (*p* = .006), and quality of life (*p* = .022) than parents of children with no other medical conditions. Finally, children with other medical conditions reported poorer quality of life (*p* = .012) and higher itch intensity (*p* = .007) than children with no other medical conditions.

# Table 1. Correlations and t-tests between dependent variables (parental quality of life, child quality of life, parental depression, parental anxiety, & parental stress) and demographic and medical variables in the full sample.

|  | Parental Stress (PIP frequency) | Parental Stress (PIP difficulty) | Depression (DASS-21 depression) | Anxiety (DASS-21 anxiety) | General Stress (DASS-21 stress) | Parent Quality of Life (FDLQI) | Child Quality of Life (CDLQI) | Itch Intensity |
| --- | --- | --- | --- | --- | --- | --- | --- | --- |
| Parent age | *r*(205) = -.09, *p* = .20 | *r*(202) = -.09, *p* =  = .23 | *r*(208) = .02, *p* = .82 | *r*(208) = -.09, *p* =.22 | *r*(208) = -.05, *p* = .48 | *r*(207) = -.09, *p* = .19 | *r*(182) = .02, *p* = .82 | *r*(184) = .07, *p* = .37 |
| Child age | *r*(176) = -.11, *p* = .14 | *r*(174) = -.08, *p* = .32 | *r*(178) = -.05, *p* = .53 | *r*(178) = -.03, *p* = .71 | *r*(178) = -.07, *p* = .37 | *r*(177) = -.13, *p* = .08 | *r*(179) = -.04, *p* = .59 | *r*(184) = -.10, *p* = .19 |
| Parent gender | *t*(202) = -.33 , *p* = .74 | *t*(199) = -.21, *p* = .84 | *t*(205) = -.42, *p* = .67 | *t*(205) = -.59, *p* = .56 | *t*(205) = -.33, *p* = .74 | *t*(204) = -.29, *p* = .77 | *t*(179) = -.51, *p* = .61 | t(181) = 1.52, *p* = .13 |
| Child gender | *t*(168.13) = -.93, *p* = .35 | *t*(167.44) = -1.15, *p* = .25 | *t*(177) = .11 , *p* = .92 | *t*(177) = -.35, *p* = .73 | *t*(177) = .12 , *p* = .91 | *t*(176) = .36 , *p* = .72 | *t*(178) = -1.20 , *p* = .23 | *t*(183) = -1.12, *p* = .26 |
| Employment status | *t*(109.99) = -2.15, *p* = .03 | *t*(105.12) = -1.90, *p* = .06 | *t*(105.53) = -1.48, *p* = .14 | *t*(100.92) = -2.33, *p* = .02 | *t*(109.13) = -1.66, *p* = .10 | *t*(203) = -2.63, *p* = .009 | *t*(97.00) = -1.85, *p* = .07 | *t*(180) = -.73, *p* = .47 |
| Ethnicity | *t*(75.47) = -2.12, *p* = .04 | *t*(67.60) = -2.33, *p* = .02 | *t*(83.23) = -1.49, *p* = .14 | *t*(203) = -1.57, *p* = .12 | *t*(85.10) = -.51, *p* = .61 | *t*(83.193) = -2.17, *p* = .03 | *t*(178) = .73, *p* = .47 | *t*(68.63) = -.05, *p* = .96 |
| Education level | *t*(200) = -.16, *p* = .87 | *t*(197) = .46, *p* = .64 | *t*(143.011) = -1.83, *p* = .07 | *t*(203) = -2.03, *p* = .04 | *t*(203) = -2.46, *p* = .02 | *t*(202) = .81, *p* = .42 | *t*(177) = .22, *p* = .82 | *t*(179) = -.64, *p* = .523 |
| Duration of condition | *r*(172) = .11, *p* = .16 | *r*(170) = .11, *p* = .14 | *r*(174) = .04, *p* = .56 | *r*(174) = .05, *p* = .48 | *r*(174) = .09, *p* = .25 | *r*(173) = .09, *p* = .23 | *r*(175) = .03, *p* = .75 | *r*(180) = .09, *p* = .23 |
| Skin condition severity | *t*(174) = -4.90, *p* <.001 | *t*(172) = -4.58, *p* <.001 | *t*(129.89) = -1.96, *p* = .052 | *t*(141.85) = -1.73, *p* = .09 | *t*(176) = -.21, *p* = .04 | *t*(139.96) = -7.22, *p* <.001 | *t*(132.94) = -5.45, *p* <.001 | *t*(180) = -4.68, *p* <.001 |
| Skin condition | *t*(172) = 1.74, *p* = .08 | *t*(170) = 1.61, *p* = .11 | *t*(174) = 1.42, *p* = .16 | *t*(174) = .58 , *p* = .57 | *t*(130.43) = 1.91, *p* = .06 | *t*(123.21) = 3.00, *p* =.003 | *t*(175) = 1.90, *p* = .06 | *t*(180) = 3.21, *p* = .002 |
| Other medical conditions | *t*(153.68) = 3.96, *p* <.001 | *t*(148.82) = 3.71, *p* <.001 | *t*(127.88) = 3.15, *p* = .003 | *t*(133.62) = 3.80, *p* <.001 | *t*(139.46) = 2.80, *p* = .006 | *t*(174) = 2.31, *p* = .022 | *t*(176) = 2.55, *p* = .012 | *t*(180.99) = 2.75, *p* = .007 |

# Table 2. Correlations between parental dispositional mindfulness, parental stress, parental psychological distress (depression, anxiety, depression), quality of life (parent and child), and itch intensity for the full sample.

|  |  |  |  |  |  |  |  |  |  |  |  |  | 11. | 12. |
| --- | --- | --- | --- | --- | --- | --- | --- | --- | --- | --- | --- | --- | --- | --- |
| Parent outcomes |  | Describe (FFMQ) |  |  |  |  |  |  |  |  |  |  |  |  |
|  | Acting with awareness (FFMQ) | .35*** |  |  |  |  |  |  |  |  |  |  |  |
|  | Non-judgement (FFMQ) | .27*** | .64*** |  |  |  |  |  |  |  |  |  |  |
|  | Non-reactivity (FFMQ) | .46*** | -.05 | -.14* |  |  |  |  |  |  |  |  |  |
|  | Parental Stress (PIP Frequency) | -.30*** | -.47*** | -.41*** | -.03 |  |  |  |  |  |  |  |  |
|  | Parental Stress (PIP Difficulty) | -.29*** | -.51*** | -.43*** | -.02 | .93*** |  |  |  |  |  |  |  |
|  | Depression (DASS-21) | -.34*** | -.58*** | -.55*** | -.02 | .56*** | .55*** |  |  |  |  |  |  |
|  | Anxiety (DASS-21) | -.29*** | -.50*** | -.53*** | -.02 | .56*** | .57*** | .87*** |  |  |  |  |  |
|  | General Stress (DASS-21) | -.29*** | -.60*** | -.57*** | -.01 | .55*** | .55*** | .89*** | .86*** |  |  |  |  |
|  | Quality of Life (FDLQI) | -.23** | -.33*** | -.27*** | .03 | .73*** | .69*** | .36*** | .36*** | .38*** |  |  |  |
| Child outcomes |  | Quality of Life (CDLQI) | -.17* | -.26*** | -.24*** | .01 | .37*** | .34*** | .37*** | .33*** | .37*** | .51*** |  |  |
|  | Itch Intensity | -.11 | -.15* | -.16* | -.02 | .19* | .21** | .21** | .17* | .22** | .35*** | .57*** |  |

Note. FDLQI, Family Dermatology Life Quality Index; CDLQI, Child Dermatology Life Quality Index; DASS, Depression Anxiety and Stress Scale; PIP, Peadiatric Inventory for Parents; FFMQ, Five Factor Mindfulness Questionnaire

*P ≤ .05

** P ≤ .01

***P ≤ .001

# Table 3. Correlations and t-tests between dependent variables (parental quality of life, child quality of life, parental depression, parental anxiety, & parental stress) and demographic and medical variables for children with eczema and their parents.

|  | Parental Stress (PIP frequency) | Parental Stress (PIP difficulty) | Depression (DASS-21 depression) | Anxiety (DASS-21 anxiety) | General Stress (DASS-21 stress) | Parent Quality of Life (FDLQI) | Child Quality of Life (CDLQI) | Itch Intensity |
| --- | --- | --- | --- | --- | --- | --- | --- | --- |
| Parent age | *r*(148) = -.10, *p* = .21 | *r*(146) = -.10, *p* =  = .21 | *r*(151) = -.04, *p* = .67 | *r*(151) = -.11, *p* =.18 | *r*(151) = -.05, *p* = .57 | *r*(150) = -.09, *p* = .30 | *r*(125) = -.02, *p* = .85 | *r*(123) = -.004, *p* = .97 |
| Child age | *r*(125) = -.08, *p* = .40 | *r*(124)= -.03, *p* = .80 | *r*(124) = .05, *p* = .59 | *r*(124) = -.05, *p* = .59 | *r*(124) = -.04, *p* = .69 | *r*(123) = -.08, *p* = .39 | *r*(125) = -.02, *p* = .79 | *r*(123) = -.07, *p* = .47 |
| Parent gender | *t*(146) = -.83 , *p* = .41 | *t*(144) = -.76, *p* = .45 | *t*(149) = -.14, *p* = .89 | *t*(149) = -.55, *p* = .58 | *t*(149) = -.22, *p* = .83 | *t*(148) = -.84, *p* = .40 | *t*(123) = .09, *p* = .93 | t(121) = 1.34, *p* = .18 |
| Child gender | *t*(120) = -1.68, *p* = .10 | *t*(118.66) = -1.81, *p* = .73 | *t*(122) = -.39, *p* = .69 | *t*(121.85) = -.83, *p* = .41 | *t*(122) = -.36 , *p* = .72 | *t*(121) = - .61 , *p* = .54 | *t*(123) = -1.22, *p* = .22 | *t*(121) = -.59, *p* = .56 |
| Employment status | *t*(62) = -1.19, *p* = .27 | *t*(60.04) = -.78, *p* = .44 | *t*(147) = -1.01, *p* = .31 | *t*(147) = -2.28, *p* = .02 | *t*(147) = -1.56, *p* = .12 | *t*(146) = -2.25, *p* = .03 | *t*(121) = -1.25, *p* = .22 | *t*(119) = -.70, *p* = .49 |
| Ethnicity | *t*(70.64) = -.99, *p* = .32 | *t*(61.95) = -1.23, *p* = .22 | *t*(146) = -781, *p* = .44 | *t*(146) = -.96, *p* = .34 | *t*(146) = .123, *p* = .90 | *t*(145) = -1.19, *p* = .24 | *t*(121) = 1.60, *p* = .11 | *t*(55.15) = 1.40, *p* = .17 |
| Education level | *t*(117) = .46, *p =* .65 | *t*(116) = 1.35, *p* = .18 | *t*(119) = -1.11, *p* = .27 | *t*(119) = -.73, *p* = .47 | *t*(119) = 1.88, *p* = .06 | *t*(118) = 1.33, *p* = .88 | *t*(120) = .33, *p* = .74 | *t*(118) = .30, *p* = .76 |
| Duration of condition | *r*(119)= .10, *p* = .31 | *r*(118) = .11, *p* = .23 | *r*(121) = .03, *p* = .76 | *r*(121) = .06, *p* = .54 | *r*(121) = .07, *p* = .43 | *r*(120) = .04, *p* = .70 | *r*(122) = .02, *p* = .84 | *r*(120) = -.02, *p* = .81 |
| Skin condition severity | *t*(120) = -4.50, *p* <.001 | *t*(119) = -4.15, *p* <.001 | *t*(104.76) = -1.95, *p* = .053 | *t*(113.75) = -1.95, *p* = .07 | *t*(122) = -1.92, *p* = .06 | *t*(121) = -76.31, *p* <.001 | *t*(109.96) = -4.67, *p* <.001 | *t*(121) = -4.00, *p* <.001 |
| Other medical conditions | *t*(118) = 3.28, *p* = .001 | *t*(117) = 2.79, *p* = .006 | *t*(104.70) = 2.31, *p* = .023 | *t*(110.64) = 2.73, *p* = .007 | *t*(111.63) = 2.92, *p* = .011 | *t*(119) = 1.07, *p* = .29 | *t*(121) = .86, *p* = .39 | *t*(119) = .66, *p* = .51 |

# Table 4. Correlations between parental dispositional mindfulness, parental stress, parental psychological distress (depression, anxiety, depression), quality of life (parent and child), and itch intensity for children with eczema and their parents.

|  |  |  |  |  |  |  |  |  |  |  |  |  |  |  |
| --- | --- | --- | --- | --- | --- | --- | --- | --- | --- | --- | --- | --- | --- | --- |
| Parent outcomes |  | Describe (FFMQ) |  |  |  |  |  |  |  |  |  |  |  |  |
|  | Acting with awareness (FFMQ) | .34*** |  |  |  |  |  |  |  |  |  |  |  |
|  | Non-judgement (FFMQ) | .32*** | .66*** |  |  |  |  |  |  |  |  |  |  |
|  | Non-reactivity (FFMQ) | .39*** | -.09 | -.11 |  |  |  |  |  |  |  |  |  |
|  | Parental Stress (PIP Frequency) | -.34*** | -.51*** | -.37*** | .001 |  |  |  |  |  |  |  |  |
|  | Parental Stress (PIP Difficulty) | -.33*** | -.57*** | -.39*** | -.02 | .92*** |  |  |  |  |  |  |  |
|  | Depression (DASS-21) | -.31*** | -.60*** | -.54*** | .03 | .53*** | .52*** |  |  |  |  |  |  |
|  | Anxiety (DASS-21) | -.28*** | -.52*** | -.51*** | .01 | .52*** | .55*** | .88*** |  |  |  |  |  |
|  | General Stress (DASS-21) | -.28*** | -.61*** | -.55*** | -.001 | .51*** | .52*** | .90*** | .87*** |  |  |  |  |
|  | Quality of Life (FDLQI) | -.29*** | -.39*** | -.23** | .08 | .71*** | .66*** | .34*** | .32*** | .34*** |  |  |  |
| Child outcomes |  | Quality of Life (CDLQI) | -.22* | -.35*** | -.28*** | .07 | .37*** | .33*** | .39*** | .36*** | .42*** | .48*** |  |  |
|  | Itch Intensity | -.19* | -.22* | -.14 | .05 | .12 | .16 | .18 | .14 | .22* | .25** | .57*** |  |

Note. FDLQI, Family Dermatology Life Quality Index; CDLQI, Child Dermatology Life Quality Index; DASS, Depression Anxiety and Stress Scale; PIP, Peadiatric Inventory for Parents; FFMQ, Five Factor Mindfulness Questionnaire

*P ≤ .05

** P ≤ .01

***P ≤ .001

# Table 5. Correlations and t-tests between dependent variables (parental quality of life, child quality of life, parental depression, parental anxiety, & parental stress) and demographic and medical variables for children with psoriasis and their parents.

|  | Parental Stress (PIP frequency) | Parental Stress (PIP difficulty) | Depression (DASS-21 depression) | Anxiety (DASS-21 anxiety) | General Stress (DASS-21 stress) | Parent Quality of Life (FDLQI) | Child Quality of Life (CDLQI) | Itch Intensity |
| --- | --- | --- | --- | --- | --- | --- | --- | --- |
| Parent age | *r*(57) = -.05, *p* = .74 | *r*(56) = -.03, *p* =  = .83 | *r*(57) = .14, *p* = .31 | *r*(57) = -.02, *p* =.89 | *r*(57) = -.04, *p* = .78 | *r*(57) = -.09, *p* = .51 | *r*(54) = .08, *p* = .58 | *r*(54) = .16, *p* = .25 |
| Child age | *r*(54) = -.13, *p* = .36 | *r*(53) = -.15, *p* = .30 | *r*(54) = -.04, *p* = .75 | *r*(54) = -.04, *p* = .77 | *r*(54) = -.12, *p* = .39 | *r*(54) = -.12, *p* = .41 | *r*(54) = -.02, *p* = .88 | *r*(54) = -.001, *p* = .99 |
| Parent gender | *t*(54) = -.74 , *p* = .46 | *t*(53) = -.94, *p* = .35 | *t*(54) = -.45, *p* = .65 | *t*(54) = -.15, *p* = .88 | *t*(54) = -.15, *p* = .88 | *t*(54) = 1.10, *p* = .28 | *t*(51) = -1.00, *p* = .32 | *t*(51) = .70, *p* = .49 |
| Child gender | *t*(53) = .68, *p* = .50 | *t*(52) = .50, *p* = .62 | *t*(53) = .65, *p* = .52 | *t*(53) = .61, *p* = .55 | *t*(53) = .68, *p* = .50 | *t*(53) = 1.36, *p* = .18 | *t*(53) = -.72 , *p* = .48 | *t*(22.24) = -1.80 , *p* = .09 |
| Employment status | *t*(55) = -2.29, *p* = .03 | *t*(54) = -2.45, *p* = .02 | *t*(18.77) = -.96, *p* = .35 | *t*(18.87) = -1.22, *p* = .24 | *t*(55) = -1.39, *p* = .17 | *t*(55) = -1.51, *p* = .14 | *t*(52) = -.65, *p* = .52 | *t*(52) = -.82, *p* = .42 |
| Ethnicity | *t*(7.94) = -2.15, *p* = .06 | *t*(7.80) = --2.34, *p* = .048 | *t*(7.88) = -1.14, *p* = .29 | *t*(55) = -1.33, *p* = .19 | *t*(55) = -1.05, *p* = .30 | *t*(7.78) = -1.69, *p* = .13 | *t*(52) = -.16, *p* = .87 | *t*(52) = -.95, *p* = .35 |
| Education level | *t*(55) = -.03, *p* = .98 | *t*(54) = -.13, *p* = .90 | *t*(55) = -.53, *p* = .60 | *t*(55) = -1.42, *p* = .60 | *t*(55) = -.35, *p* = .73 | *t*(55) = -.46, *p* = .64 | *t*(52) = .02, *p* = .98 | *t*(52) = -1.18, *p* = .24 |
| Duration of condition | *r*(53) = -.02, *p* = .89 | *r*(52) = -.05, *p* = .74 | *r*(53) = -.03, *p* = .82 | *r*(53) = .03, *p* = .812 | *r*(53) = .01, *p* = .96 | *r*(53) = -.05, *p* = .75 | *r*(53) = -.13, *p* = .36 | *r*(53) = .06, *p* = .67 |
| Skin condition severity | *t*(52) = -1.32, *p = .*19 | *t*(51) = -1.20, *p* = .24 | *t*(52) = .06, *p* = .956 | *t*(52) = -.13, *p* = .90 | *t*(52) = -.04, *p* = .97 | *t*(52) = -2.81, *p =* .007 | *t*(15.75) = -1.70, *p* = .03 | *t*(52) = -1.70, *p =* .10 |
| Other medical conditions | *t*(53) = 1.78, *p = .*08 | *t*(52) = 2.28, *p =*.03 | *t*(23.80) = 1.66, *p* = .11 | *t*(23.55) = 2.39, *p =* .03 | *t*(53) = .860, *p* = .39 | *t*(53) = 2.35, *p* = .02 | *t*(53) = 3.17, *p* = .003 | *t*(53) = 2.91, *p* = .005 |

# Table 6. Correlations between parental dispositional mindfulness, parental stress, parental psychological distress (depression, anxiety, depression), quality of life (parent and child), and itch intensity for children with psoriasis and their parents.

|  |  |  |  |  |  |  |  |  |  |  |  |  |  |  |
| --- | --- | --- | --- | --- | --- | --- | --- | --- | --- | --- | --- | --- | --- | --- |
| Parent outcomes |  | Describe (FFMQ) |  |  |  |  |  |  |  |  |  |  |  |  |
|  | Acting with awareness (FFMQ) | .42*** |  |  |  |  |  |  |  |  |  |  |  |
|  | Non-judgement (FFMQ) | .18 | .57*** |  |  |  |  |  |  |  |  |  |  |
|  | Non-reactivity (FFMQ) | .59*** | .05 | -.25 |  |  |  |  |  |  |  |  |  |
|  | Parental Stress (PIP Frequency) | -.22 | -.33* | -.51*** | -.06 |  |  |  |  |  |  |  |  |
|  | Parental Stress (PIP Difficulty) | -.20 | -.34* | -.51*** | -.03 | .97*** |  |  |  |  |  |  |  |
|  | Depression (DASS-21) | -.46*** | -.51*** | -.54*** | -.14 | .66*** | .65*** |  |  |  |  |  |  |
|  | Anxiety (DASS-21) | -.35** | -.42*** | -.59*** | -.06 | .64*** | .62*** | .84*** |  |  |  |  |  |
|  | General Stress (DASS-21) | -.36** | -.57*** | -.60*** | -.11 | .66*** | .64*** | .85*** | .81*** |  |  |  |  |
|  | Quality of Life (FDLQI) | -.08 | -.11 | -.34** | -.11 | .75*** | .76*** | .40*** | .48*** | .45*** |  |  |  |
| Child outcomes |  | Quality of Life (CDLQI) | .07 | -.02 | -.08 | -.13 | .34** | .34* | .29* | .29* | .20 | .54*** |  |  |
|  | Itch Intensity | .01 | .01 | -.05 | -.19 | .23 | .26 | .26 | .21 | .18 | .28* | .47*** |  |

Note. FDLQI, Family Dermatology Life Quality Index; CDLQI, Child Dermatology Life Quality Index; DASS, Depression Anxiety and Stress Scale; PIP, Peadiatric Inventory for Parents; FFMQ, Five Factor Mindfulness Questionnaire

*P ≤ .05

** P ≤ .01

***P ≤ .001

# Table 7. Comparisons of correlations (between parental dispositional mindfulness, parental stress, depression, anxiety, general stress, quality of life, and child quality of life and itch intensity) between of children with psoriasis and their parents, and children with eczema and their parents.

|  |  | Describe (FFMQ) | Acting with awareness (FFMQ) | Non-judgement (FFMQ) | Non-reactivity (FFMQ) |
| --- | --- | --- | --- | --- | --- |
| Parent outcomes | Parental Stress (PIP Frequency) | *z* = -.86  *p* = .20 | *z* = 1.42  *p* = .08 | *z* = 1.09  *p* = 0.14 | *z* = .353  *p* = .36 |
| Parental Stress (PIP Difficulty) | *z* = -.88  *p* = .19 | *z* = -1.833  *p* = .03 | *z* = .93  *p* = .18 | *z* = .106  *p* = .46 |
| Depression (DASS-21) | *z* = 1.15  *p* = .13 | *z* = -.83  *p* = .20 | *z* = .03  *p* = .49 | *z* = 1.02  *p* = .15 |
| Anxiety (DASS-21) | *z* = .512  *p* = .30 | *z* = -.81  *p* = .21 | *z* = .80  *p* = .21 | *z* = .44  *p* = .33 |
| General Stress (DASS-21) | *z* = .60  *p* = .28 | *z* = -2.08  *p* = .05 | *z* = .55  *p* = .29 | *z* = .67  *p* = .25 |
| Quality of Life (FDLQI) | *z* = -.29  *p* = .08 | *z* = -1.20  *p* = .12 | *z* = .77  *p* = .22 | *z* = 1.18  *p* = .12 |
| Child outcomes | Quality of Life (CDLQI) | *z* = -1.08  *p* = .14 | *z* = -.35  *p* = -.009 | *z* = -1.2  *p* = .12 | *z* = .90  *p* = .18 |
| Itch Intensity | *z* = -1.00  *p* = .16 | *z* = -1.23  *p* = 0.11 | *z* = -.63  *p* = .27 | *z* = 1.53  *p* = 0.06 |

The correlations reported above for the sample with eczema and the sample with psoriasis were compared using an online calculator <https://www.psychometrica.de/correlation.html>. A bonferonni correction was made to correct for multiple analyses and *p-*values of ≤ .002 were considered significant. There were no significant differences between any of the correlations in the sample with eczema and the sample with psoriasis (see Table 4).
