# Supplementary material for: Is Parental Mindfulness Associated with Quality of Life and Itch Intensity in Children with Psoriasis and Eczema and Well-being in Parents?
Source: Springer Nature journal article supplement (doi:10.1007/s12671-021-01733-2), 2021-09-04
Supplement: MOESM4 [file 19632500]

**Supplementary Materials D**

**Table 1. Summary of moderated regression analyses predicting parental stress (PIP Frequency).**

|  |  | Skin Condition x FFMQ Describe | | |  | Skin Condition x FFMQ Acting with awareness | | |  | Skin Condition x FFMQ Non-judgement | | |  | Skin Condition x FFMQ Non-reactivity | | |
| --- | --- | --- | --- | --- | --- | --- | --- | --- | --- | --- | --- | --- | --- | --- | --- | --- |
|  |  | *B* | *SE* | *p* |  | *B* | *SE* | *p* |  | *B* | *SE* | *p* |  | *B* | *SE* | *p* |
| Employment status |  | 3.87 | 4.35 | .37 |  | 3.62 | 4.36 | .41 |  | 3.54 | 4.33 | .41 |  | 3.72 | 4.34 | .39 |
| Ethnicity |  | 13.06 | 4.40 | .003 |  | 12.99 | 4.39 | .004 |  | 12.73 | 4.39 | .004 |  | 13.00 | 4.40 | .004 |
| Skin condition severity |  | 17.92 | 3.97 | <.001 |  | 18.19 | 4.00 | <.001 |  | 18.09 | 3.95 | <.001 |  | 18.06 | 3.97 | <.001 |
| Other medical conditions |  | -13.00 | 3.84 | .001 |  | -12.97 | 3.83 | .001 |  | -12.64 | 3.82 | .001 |  | -12.86 | 3.83 | .001 |
| FFMQ Describe |  | -0.72 | 0.92 | .44 |  | -0.47 | 0.39 | .23 |  | -0.48 | 0.39 | .22 |  | -0.46 | 0.39 | .24 |
| FFMQ Acting with awareness |  | -1.14 | 0.35 | .001 |  | -0.91 | 0.83 | .28 |  | -1.11 | 0.35 | .002 |  | -1.14 | 0.35 | .001 |
| FFMQ Non-judgement |  | -0.86 | 0.34 | .01 |  | -0.87 | 0.34 | .01 |  | -0.07 | 0.79 | .93 |  | -0.89 | 0.34 | .01 |
| FFMQ Non-reactivity |  | 0.10 | 0.45 | .82 |  | 0.12 | 0.45 | .79 |  | 0.06 | 0.45 | .89 |  | 0.38 | 1.10 | .73 |
| Skin Condition |  | 3.83 | 4.41 | .39 |  | 3.90 | 4.42 | .38 |  | 4.60 | 4.45 | .30 |  | 3.88 | 4.42 | .38 |
| Interaction |  | 0.19 | 0.65 | .77 |  | -0.18 | 0.66 | .76 |  | -0.65 | 0.58 | .26 |  | -0.19 | 0.75 | .80 |

**Table 2. Summary of moderated regression analyses predicting parental stress (PIP Difficulty).**

|  |  | Skin Condition x FFMQ Describe | | |  | Skin Condition x FFMQ Acting with awareness | | |  | Skin Condition x FFMQ Non-Judgement | | |  | Skin Condition x FFMQ Non-Reactivity | | |
| --- | --- | --- | --- | --- | --- | --- | --- | --- | --- | --- | --- | --- | --- | --- | --- | --- |
|  |  | *B* | *SE* | *p* |  | *B* | *SE* | *p* |  | *B* | *SE* | *p* |  | *B* | *SE* | *p* |
| Ethnicity |  | 18.57 | 4.76 | <.001 |  | 18.41 | 4.75 | <.001 |  | 18.09 | 4.74 | <.001 |  | 18.43 | 4.75 | <.001 |
| Skin condition severity |  | 17.85 | 4.34 | <.001 |  | 18.22 | 4.36 | <.001 |  | 18.06 | 4.31 | <.001 |  | 17.89 | 4.33 | <.001 |
| Other medical conditions |  | -12.75 | 4.22 | .003 |  | -12.62 | 4.20 | .003 |  | -12.06 | 4.19 | .005 |  | -12.63 | 4.20 | .003 |
| FFMQ Describe |  | -0.64 | 1.04 | .53 |  | -0.23 | 0.43 | .60 |  | -0.25 | 0.43 | .56 |  | -0.25 | 0.43 | .56 |
| FFMQ Acting with awareness |  | -1.84 | 0.39 | <.001 |  | -1.51 | 0.93 | .11 |  | -1.79 | 0.39 | <.001 |  | -1.84 | 0.39 | <.001 |
| FFMQ Non-judgement |  | -0.86 | 0.37 | .02 |  | -0.88 | 0.37 | .02 |  | 0.23 | 0.87 | .79 |  | -0.85 | 0.37 | .02 |
| FFMQ_Non-reactivity |  | 0.07 | 0.50 | .89 |  | 0.09 | 0.49 | .85 | -0.0003 | | 0.50 | .99 |  | -0.44 | 1.24 | .72 |
| Skin Condition |  | 5.92 | 4.84 | .22 |  | 5.98 | 4.85 | .22 |  | 6.90 | 4.87 | .16 |  | 5.79 | 4.85 | .23 |
| Interaction |  | 0.32 | 0.74 | .66 |  | -0.25 | 0.65 | .69 |  | -0.89 | 0.64 | .16 |  | 0.40 | 0.84 | .64 |

**Table 3. Summary of moderated regression analyses predicting parent depression (DASS-21).**

|  |  | Skin Condition x FFMQ Describe | | |  | Skin Condition x FFMQ Acting with awareness | | |  | Skin Condition x FFMQ Non-judgement | | |  | Skin Condition x FFMQ Non-reactivity | | |
| --- | --- | --- | --- | --- | --- | --- | --- | --- | --- | --- | --- | --- | --- | --- | --- | --- |
|  |  | *B* | *SE* | *p* |  | *B* | *SE* | *p* |  | *B* | *SE* | *p* |  | *B* | *SE* | *p* |
| Other medical conditions |  | -1.16 | 0.72 | .11 |  | -1.19 | 0.72 | .10 |  | -1.21 | 0.73 | .10 |  | -1.20 | 0.72 | .10 |
| FFMQ Describe |  | -0.03 | 0.17 | .86 |  | -0.14 | 0.07 | .04 |  | -0.14 | 0.07 | .05 |  | -0.14 | 0.07 | .06 |
| FFMQ Acting with awareness |  | -0.30 | 0.07 | <.001 |  | -0.43 | 0.16 | .008 |  | -0.31 | 0.07 | <.001 |  | -0.30 | 0.07 | <.001 |
| FFMQ Non-judgement |  | -0.24 | 0.06 | <.001 |  | -0.23 | 0.06 | <.001 |  | -0.24 | 0.16 | .14 |  | -0.24 | 0.06 | <.001 |
| FFMQ_Non-reactivity |  | -0.02 | 0.08 | .82 |  | -0.02 | 0.08 | .79 |  | -0.02 | 0.08 | .80 |  | 0.12 | 0.21 | .56 |
| Skin Condition |  | -0.85 | 0.81 | .85 |  | -0.92 | 0.81 | .26 |  | -0.85 | 0.83 | .31 |  | -0.84 | 0.81 | .30 |
| Interaction |  | -0.08 | 0.12 | .49 |  | 0.10 | 0.12 | .39 | -0.001 | | 0.12 | .99 |  | -0.11 | 0.14 | .46 |

**Table 4. Summary of moderated regression analyses predicting parent anxiety (DASS-21).**

|  |  | Skin Condition x FFMQ Describe | | |  | Skin Condition x FFMQ Acting with awareness | | |  | Skin Condition x FFMQ Non-judgement | | |  | Skin Condition x FFMQ Non-reactivity | | |
| --- | --- | --- | --- | --- | --- | --- | --- | --- | --- | --- | --- | --- | --- | --- | --- | --- |
|  |  | *B* | *SE* | *p* |  | *B* | *SE* | *p* |  | *B* | *SE* | *p* |  | *B* | *SE* | *p* |
| Employment status |  | 1.72 | 0.73 | .02 |  | 1.77 | 0.73 | .02 |  | 1.74 | 0.73 | .02 |  | 1.72 | 0.70 | .02 |
| Education level |  | 1.10 | 0.70 | .12 |  | 1.15 | 0.70 | .11 |  | 1.09 | 0.70 | .12 |  | 1.11 | 0.70 | .11 |
| Other medical conditions |  | -1.37 | 0.66 | .04 |  | -1.37 | 0.65 | .04 |  | -1.34 | 0.66 | .04 |  | -1.39 | 0.66 | .04 |
| FFMQ Describe |  | -0.05 | 0.16 | .74 |  | -0.10 | 0.07 | .12 |  | -0.10 | 0.07 | .13 |  | -0.10 | 0.07 | .13 |
| FFMQ Acting with awareness |  | -0.16 | 0.06 | .01 |  | -0.24 | 0.14 | .09 |  | -0.16 | 0.06 | .01 |  | -0.16 | 0.06 | .01 |
| FFMQ Non-judgement |  | -0.25 | 0.06 | <.001 |  | -0.24 | 0.06 | <.001 |  | -0.18 | 0.14 | .18 |  | -0.25 | 0.06 | <.001 |
| FFMQ Non-reactivity |  | -0.01 | 0.07 | .86 |  | -0.01 | 0.07 | .81 |  | -0.02 | 0.07 | .79 |  | 0.04 | 0.18 | .82 |
| Skin Condition |  | 0.24 | 0.73 | .74 |  | 0.22 | 0.73 | .77 |  | 0.32 | 0.74 | .66 |  | 0.25 | 0.73 | .73 |
| Interaction |  | -0.04 | 0.11 | .73 |  | 0.07 | 0.10 | .53 |  | -0.05 | 0.10 | .62 |  | -0.04 | 0.13 | .73 |

**Table 5. Summary of moderated regression analyses predicting parent general stress (DASS-21).**

|  |  | Skin Condition x FFMQ Describe | | |  | Skin Condition x FFMQ Acting with awareness | | |  | Skin Condition x FFMQ Non-judgement | | |  | Skin Condition x FFMQ Non-reactivity | | |
| --- | --- | --- | --- | --- | --- | --- | --- | --- | --- | --- | --- | --- | --- | --- | --- | --- |
|  |  | *B* | *SE* | *p* |  | *B* | *SE* | *p* |  | *B* | *SE* | *p* |  | *B* | *SE* | *p* |
| Education status |  | 1.51 | 0.77 | .052 |  | 1.55 | 0.77 | .045 |  | 1.52 | 0.77 | .051 |  | 1.53 | 0.77 | .049 |
| Skin condition severity |  | 1.10 | 0.74 | .14 |  | 1.00 | 0.74 | .18 |  | 1.10 | 0.74 | .14 |  | 1.13 | 0.74 | .13 |
| Other medical conditions |  | -0.82 | 0.70 | .24 |  | -0.81 | 0.70 | .25 |  | -0.84 | 0.71 | .24 |  | -0.81 | 0.70 | .25 |
| FFMQ Describe |  | -0.08 | 0.17 | .65 |  | -0.04 | 0.07 | .44 |  | -0.04 | 0.07 | .58 |  | -0.03 | 0.07 | .64 |
| FFMQ Acting with awareness |  | -0.33 | 0.06 | <.001 |  | -0.49 | 0.16 | .002 |  | -0.33 | 0.06 | <.001 |  | -0.32 | 0.06 | <.001 |
| FFMQ Non-judgement |  | -0.24 | 0.06 | <.001 |  | -0.23 | 0.06 | <.001 |  | -0.28 | 0.15 | .06 |  | -0.24 | 0.06 | <.001 |
| FFMQ Non-reactivity |  | -0.11 | 0.08 | .19 |  | -0.11 | 0.08 | .19 |  | -0.10 | 0.08 | .21 |  | 0.03 | 0.20 | .87 |
| Skin Condition |  | -0.36 | 0.81 | .66 |  | -0.46 | 0.82 | .56 |  | -0.42 | 0.84 | .62 |  | -0.36 | 0.81 | .67 |
| Interaction |  | 0.03 | 0.12 | .81 |  | 0.13 | 0.11 | .26 |  | 0.03 | 0.11 | .76 |  | -0.10 | 0.14 | .46 |

**Table 6. Summary of moderated regression analyses predicting parent quality of life (FDLQI).**

|  |  | Skin Condition x FFMQ Describe | | |  | Skin Condition x FFMQ Acting with awareness | | |  | Skin Condition x FFMQ Non-judgement | | |  | Skin Condition x FFMQ Non-reactivity | | |
| --- | --- | --- | --- | --- | --- | --- | --- | --- | --- | --- | --- | --- | --- | --- | --- | --- |
|  |  | *B* | *SE* | *p* |  | *B* | *SE* | *p* |  | *B* | *SE* | *p* |  | *B* | *SE* | *p* |
| Employment status |  | 1.08 | 1.02 | .29 |  | 1.08 | 1.02 | .29 |  | 1.01 | 1.02 | .32 |  | 0.96 | 1.02 | .35 |
| Ethnicity |  | 2.81 | 1.02 | .01 |  | 2.78 | 1.02 | .01 |  | 2.76 | 1.02 | .01 |  | 2.79 | 1.02 | .01 |
| Skin condition severity |  | 6.77 | 0.92 | <.001 |  | 6.73 | 0.93 | <.001 |  | 6.82 | 0.92 | <.001 |  | 6.83 | 0.92 | <.001 |
| Other medical conditions |  | -2.46 | 0.89 | .01 |  | -2.38 | 0.89 | .01 |  | -2.38 | 0.89 | .01 |  | -2.38 | 0.88 | .01 |
| FFMQ Describe |  | -0.30 | 0.21 | .16 |  | -0.30 | 0.21 | .16 |  | -0.15 | 0.09 | .08 |  | -0.15 | 0.09 | .10 |
| FFMQ Acting with awareness |  | -1.14 | 0.08 | .08 |  | -0.24 | 0.19 | .21 |  | -0.14 | 0.08 | .09 |  | -0.14 | 0.08 | .09 |
| FFMQ Non-judgement |  | -0.10 | 0.08 | .20 |  | -0.10 | 0.08 | .18 |  | -0.05 | 0.18 | .80 |  | -0.11 | 0.08 | .15 |
| FFMQ Non-reactivitiy |  | 0.12 | 0.10 | .25 |  | 0.13 | 0.10 | .20 |  | 0.12 | 0.10 | .23 |  | 0.34 | 0.25 | .17 |
| Skin Condition |  | 0.14 | 1.03 | .89 |  | 0.10 | 1.03 | .93 |  | 0.20 | 1.05 | .85 |  | 0.18 | 1.03 | .86 |
| Interaction |  | 0.11 | 0.15 | .46 |  | 0.08 | 0.14 | .55 |  | -0.05 | 0.13 | .72 |  | -0.16 | 0.17 | .35 |

**Table 7. Summary of moderated regression analyses predicting child quality of life (CDLQI).**

|  |  | Skin Condition x FFMQ Describe | | |  | Skin Condition x FFMQ Acting with awareness | | |  | Skin Condition x FFMQ Non-judgement | | |  | Skin Condition x FFMQ Non-reactivity | | |
| --- | --- | --- | --- | --- | --- | --- | --- | --- | --- | --- | --- | --- | --- | --- | --- | --- |
|  |  | *B* | *SE* | *p* |  | *B* | *SE* | *p* |  | *B* | *SE* | *p* |  | *B* | *SE* | *p* |
| Skin condition severity |  | 5.42 | 1.01 | <.001 |  | 5.30 | 1.02 | <.001 |  | 5.41 | 1.01 | <.001 |  | 5.42 | 1.01 | <.001 |
| Other medical conditions |  | -2.54 | 0.98 | .01 |  | -2.44 | 0.98 | .01 |  | -2.55 | 0.98 | .01 |  | -2.49 | 0.98 | .01 |
| FFMQ Describe |  | -0.19 | 0.24 | .43 |  | -0.09 | 0.10 | .37 |  | -0.09 | 0.10 | .39 |  | -0.09 | 0.10 | .41 |
| FFMQ Acting with awareness |  | 0.001 | 0.09 | .99 |  | -0.19 | 0.22 | .40 |  | -0.003 | 0.09 | .98 |  | 0.002 | 0.09 | .99 |
| FFMQ Non-judgement |  | -0.19 | 0.09 | .03 |  | -0.19 | 0.09 | .03 |  | -0.34 | 0.21 | .11 |  | -0.19 | 0.09 | .03 |
| FFMQ Non-reactivity |  | 0.07 | 0.12 | .56 |  | 0.07 | 0.12 | .54 |  | 0.07 | 0.12 | .53 |  | 0.17 | 0.28 | .53 |
| Skin Condition |  | 0.45 | 1.12 | .69 |  | 0.37 | 1.12 | .33 |  | 0.27 | 1.14 | .82 |  | 0.43 | 1.12 | .70 |
| Interaction |  | 0.07 | 0.16 | .66 |  | 0.15 | 0.16 | .35 |  | 0.12 | 0.16 | .45 |  | -0.08 | 0.19 | .69 |

**Table 8. Summary of moderated regression analyses predicting itch severity.**

|  |  | Skin Condition x FFMQ Describe | | |  | Skin Condition x FFMQ Acting with awareness | | |  | Skin Condition x FFMQ Non-judgement | | |  | Skin Condition x FFMQ Non-reactivity | | |
| --- | --- | --- | --- | --- | --- | --- | --- | --- | --- | --- | --- | --- | --- | --- | --- | --- |
|  |  | *B* | *SE* | *p* |  | *B* | *SE* | *p* |  | *B* | *SE* | *p* |  | *B* | *SE* | *p* |
| Skin condition severity |  | 1.65 | 0.40 | <.001 |  | 1.66 | 0.40 | <.001 |  | 1.67 | 0.40 | <.001 |  | 1.65 | 0.40 | <.001 |
| Other medical conditions |  | -0.85 | 0.38 | .03 |  | -0.81 | 0.38 | .04 |  | -0.83 | 0.38 | .03 |  | -0.80 | 0.38 | .04 |
| FFMQ Describe |  | -0.10 | 0.92 | .29 |  | -0.03 | 0.04 | .51 |  | -0.03 | 0.04 | .51 |  | -0.02 | 0.04 | .57 |
| FFMQ Acting with awareness |  | 0.01 | 0.04 | .80 |  | -0.01 | 0.08 | .91 |  | 0.01 | 0.04 | .80 |  | 0.01 | 0.04 | .78 |
| FFMQ Non-judgement |  | -0.03 | 0.03 | .32 |  | -0.04 | 0.03 | .30 |  | -0.05 | 0.08 | .52 |  | -0.04 | 0.03 | .28 |
| FFMQ Non-reactivity |  | -0.001 | 0.05 | .99 |  | 0.002 | 0.05 | .97 |  | 0.002 | 0.05 | .96 |  | 0.10 | 0.11 | .35 |
| Skin Condition |  | -0.69 | 0.43 | .11 |  | -0.70 | 0.43 | .11 |  | -0.71 | 0.44 | .11 |  | -0.71 | 0.43 | .11 |
| Interaction |  | 0.05 | 0.06 | .40 |  | 0.02 | 0.06 | .80 |  | 0.01 | 0.06 | .83 |  | -0.08 | 0.07 | .31 |
